# Supplementary material for: Role of lamp type in conventional batch and micro-photoreactor for photocatalytic hydrogen production
Source: Frontiers journal article supplement (doi:10.3389/fchem.2023.1271410), 2023-09-20
Supplement: Data_Sheet_1.pdf [file Data_Sheet_1.pdf]

## Supplementary material

### Characterization of NiO-TiO<sub>2</sub> photocatalyst

#### Experimental

X-ray diffraction (XRD) pattern was recorded using a diffractometer (MiniFlex 600, Rigaku, Japan) with a PDF-2 database and D/teX Ultra detector. The X-ray source was a CuK $\alpha$  tube operated at 40 kV and 15 mA. The slit width was set at 10 nm. The sample was measured at 10°/min at a step size of 0.02° and a 2 $\theta$  range of 10–80°. The content of the phase was determined using the reference intensity ratio (RIR) method. (Dubnová, L., et al., Front. Chem. 9:803764. doi: 10.3389/fchem.2021.803764)

Raman spectra were measured on a Nicolet DXR SmartRaman spectrometer (Thermo Fisher Scientific, USA). (Kočí, K., et al., Front. Chem. 6:44. doi: 10.3389/fchem.2018.00044)

Diffuse reflectance spectrum was measured in quartz cuvettes using a GBS CINTRA 303 spectrometer (GBC Scientific Equipment, Australia) equipped with an integrating sphere. Kubelka–Munk function was calculated based on the equation  $F(R_{\infty}) = (1 - R_{\infty})^2 / (2 \cdot R_{\infty})$ , where  $R_{\infty}$  is the diffuse reflectance from a semi-infinite layer. Indirect band gap energy was determined from the dependence of  $(\alpha \cdot h \cdot \nu)^{1/2}$  against photon energy, where it is possible to assume that the absorption coefficient ( $\alpha$ ) is approximately equal to the Kubelka–Munk function. (Dubnová, L., et al., Applied Surface Science 469: 879-886. doi:10.1016/j.apsusc.2018.11.098)

#### Results

NiO-TiO<sub>2</sub> photocatalyst contain pure anatase phase based on XRD and Raman spectroscopy. Fig. S1 shows XRD pattern of 0.2 wt. % NiO-TiO<sub>2</sub> photocatalyst. Diffraction lines of material are evident at  $2\theta \approx 25.3; 38.1; 48.1; 53.9; 55.1; 62.7; 69.2; 70.1; 75.2^\circ$  reflecting (101), (004), (200), (105), (211), (204), (116), (220), (215) planes of the anatase phase (ICDD PDF, 00-064-0863). Table S1 gives the crystallite size and the lattice parameters of 0.2 wt. % NiO-TiO<sub>2</sub> photocatalyst. Fig. S2 shows Raman spectrum of 0.2 wt. % NiO-TiO<sub>2</sub> photocatalyst, where bands with the maximum at 144, 195, 396, 517, and 639 cm<sup>-1</sup> correspond to the presence of the anatase phase. Fig. 3S shows DR UV-Vis spectrum and recalculated spectrum of 0.2 wt. % NiO-TiO<sub>2</sub> photocatalyst for determination of band gap energy. The band gap energy of the studied NiO-TiO<sub>2</sub> was 2.53 eV. (Table S1)

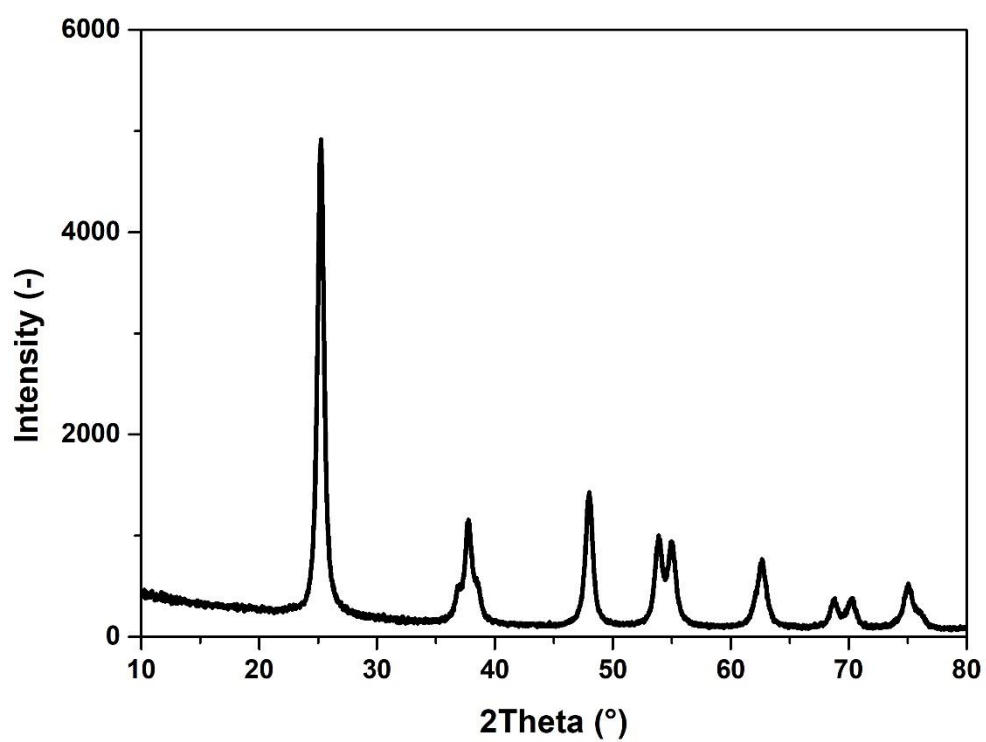

**Fig. S1** X-ray diffraction analysis of 0.2 wt. % NiO-TiO<sub>2</sub> photocatalyst

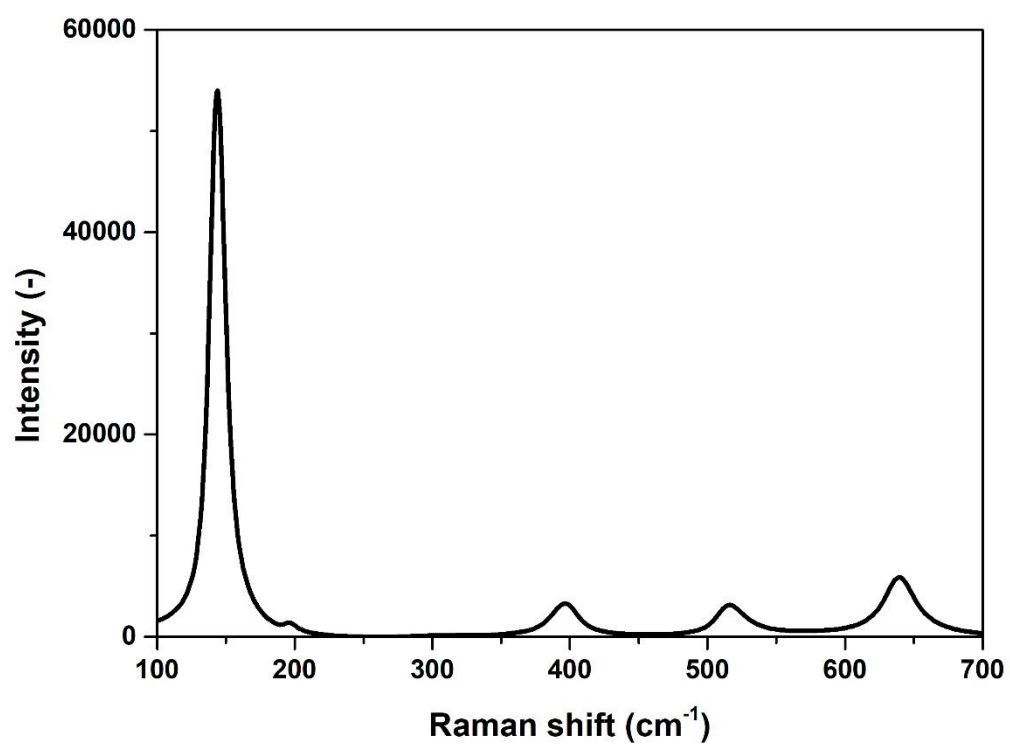

**Fig. S2** Raman spectrum of 0.2 wt. % NiO-TiO<sub>2</sub> photocatalyst

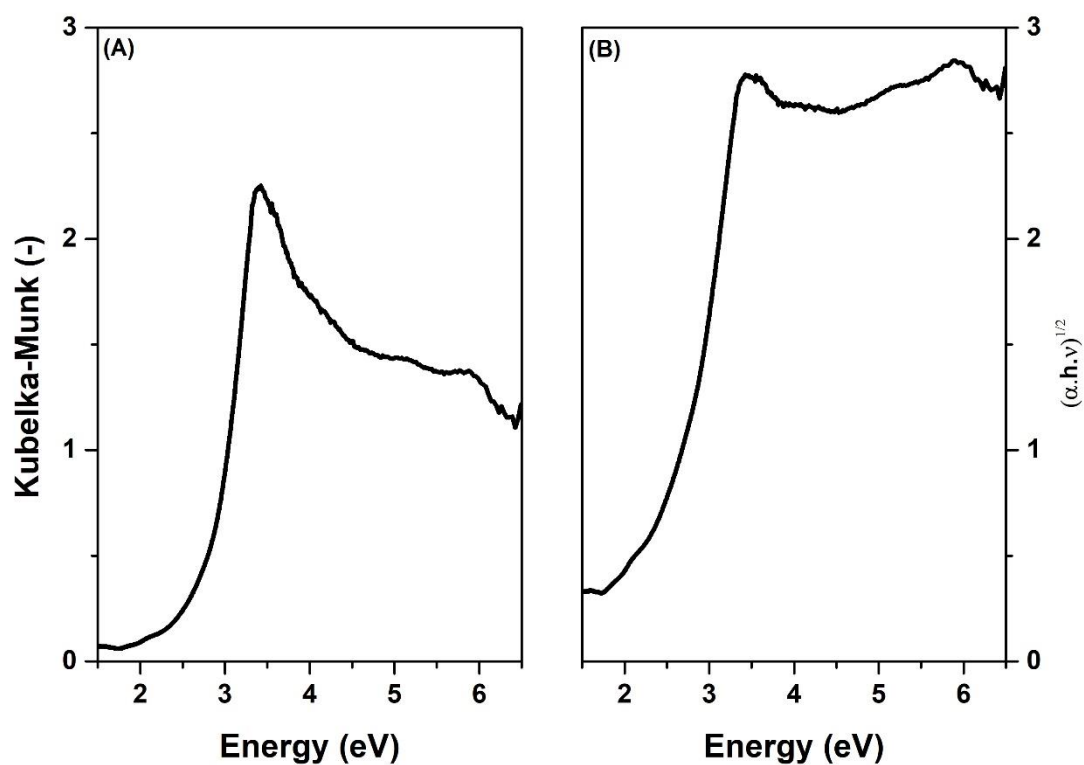

**Fig. S3** DR UV-Vis spectrum (A) of 0.2 wt. % NiO-TiO<sub>2</sub> photocatalyst recalculated to dependence of  $(\alpha \cdot h \cdot \nu)^{1/2}$  on energy (B).

**Table S1** Lattice parameters, crystallite size, and indirect band gap of 0.2 wt. % NiO-TiO<sub>2</sub> photocatalyst

| Lattice parameters |        | Crystallite size | Anatase phase | Indirect band gap |
|--------------------|--------|------------------|---------------|-------------------|
| a = b (Å)          | c (Å)  | (Å)              | (%)           | (eV)              |
| 3,7921             | 9,5308 | 102              | 100           | 2.53              |

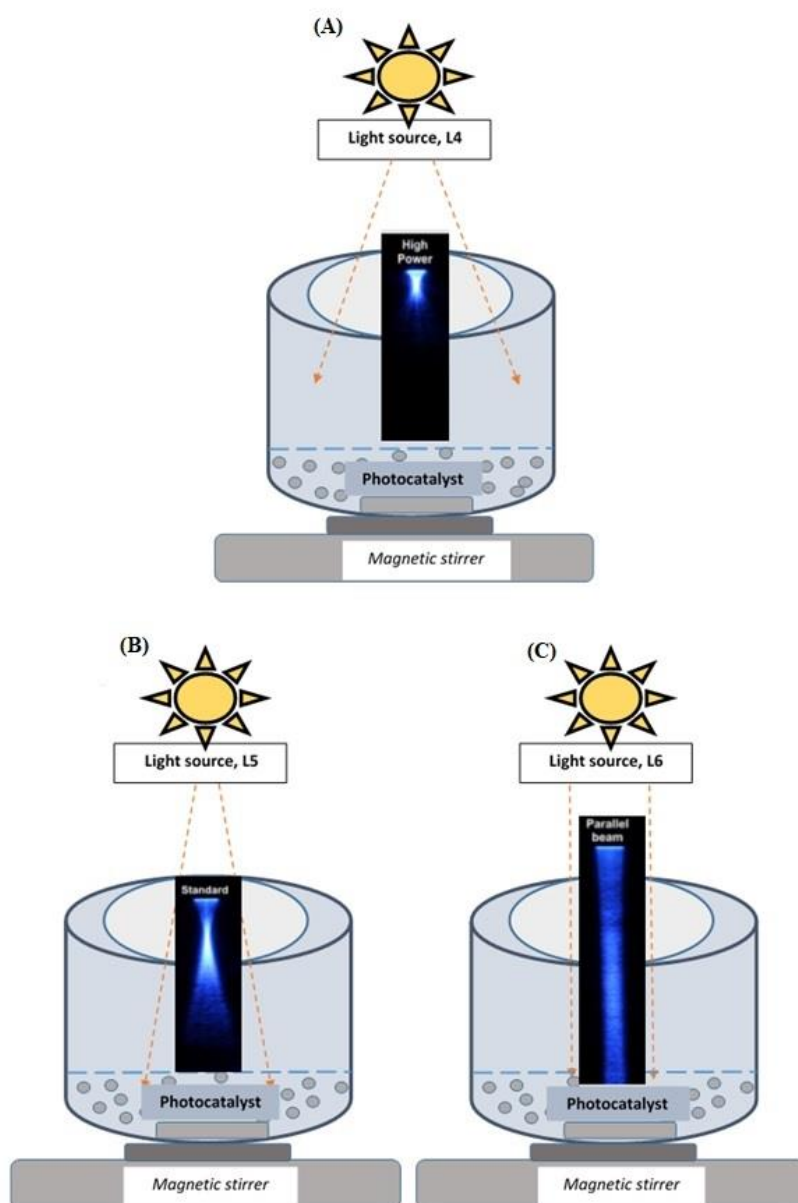

**Fig. S4** Interchangeable optics and beam profiles of UV-LED solo P – high power (L4), UV-LED solo P – standard (L5) and UV-LED solo P – parallel beam (L6)

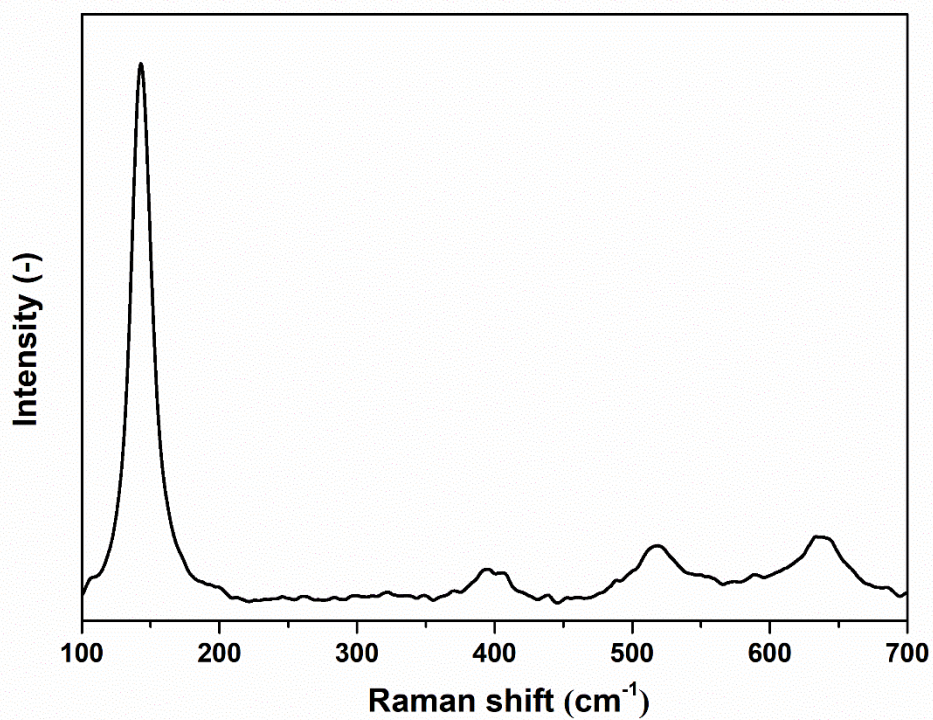

**Fig. S5** Raman spectrum of TiO<sub>2</sub> thin film

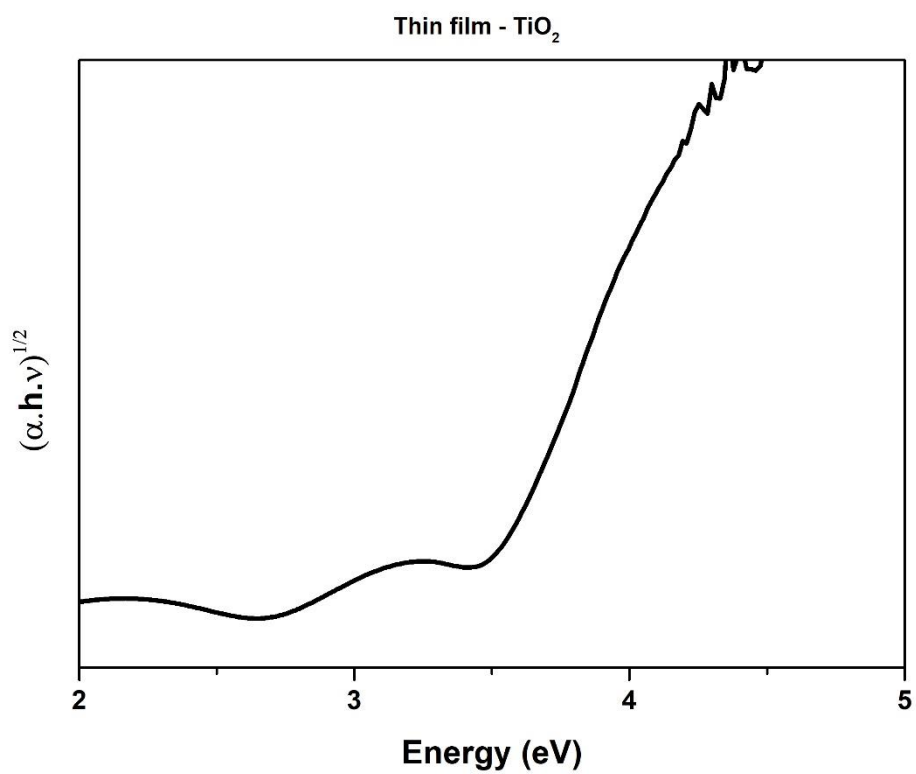

**Fig. S6** UV-Vis spectrum of TiO<sub>2</sub> thin film

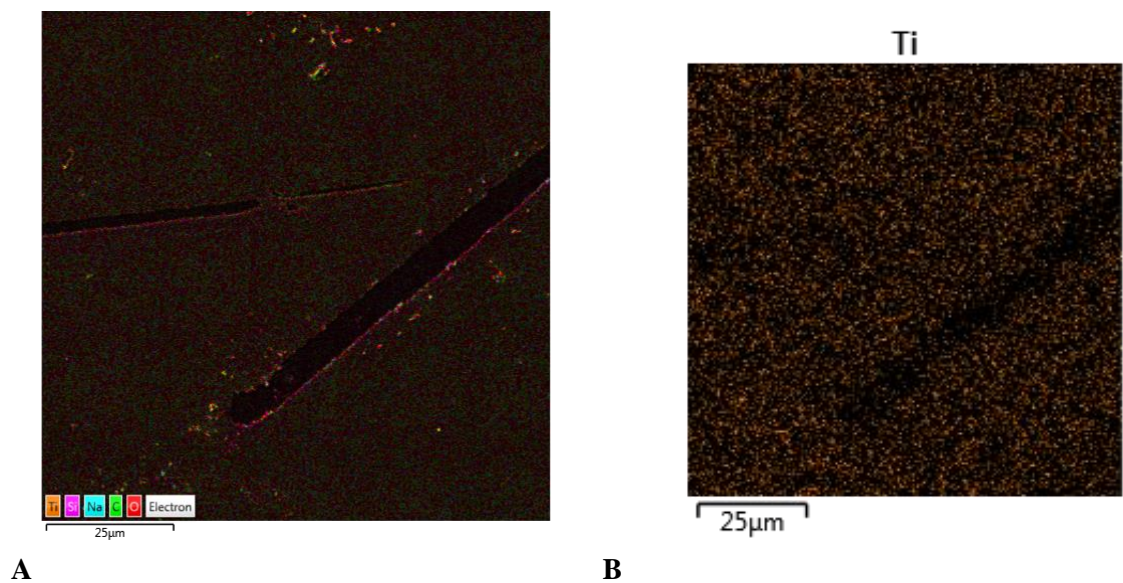

**Fig. S7** SEM EDX - Glass with a groove in a thin layer of TiO<sub>2</sub> film (A) and distribution of Ti (B)

**Table S2** SEM-EDX – composition of TiO<sub>2</sub> thin film and borosilicate glass

| Spectrum Label | TiO <sub>2</sub> thin film<br>(SEM HV 5kV) | Borosilicate glass<br>(SEM HV 5kV) | Borosilicate glass<br>(SEM HV 20 kV) |
|----------------|--------------------------------------------|------------------------------------|--------------------------------------|
|                | At. %                                      |                                    |                                      |
| B              |                                            | 10.07                              |                                      |
| O              | 65.04                                      | 63.75                              | 67.41                                |
| Na             | 0.88                                       | 0.06                               | 1.09                                 |
| Al             | 0.37                                       | 0.81                               | 1.01                                 |
| Si             | 10.87                                      | 25.3                               | 30.18                                |
| K              |                                            |                                    | 0.3                                  |
| Ti             | 22.83                                      |                                    |                                      |

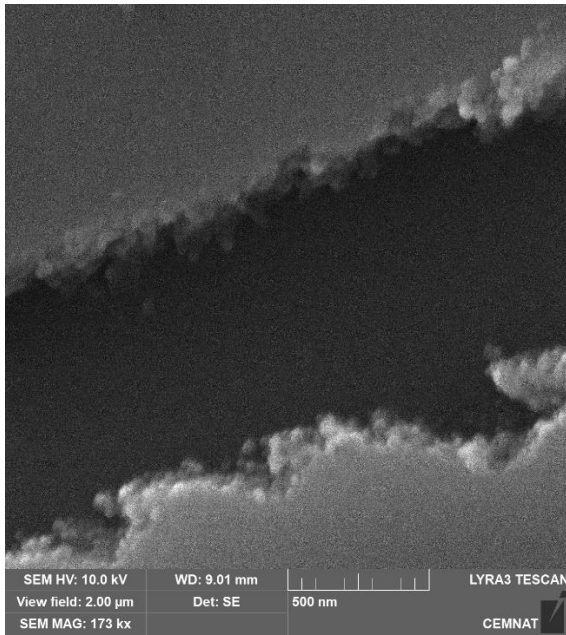

**A**

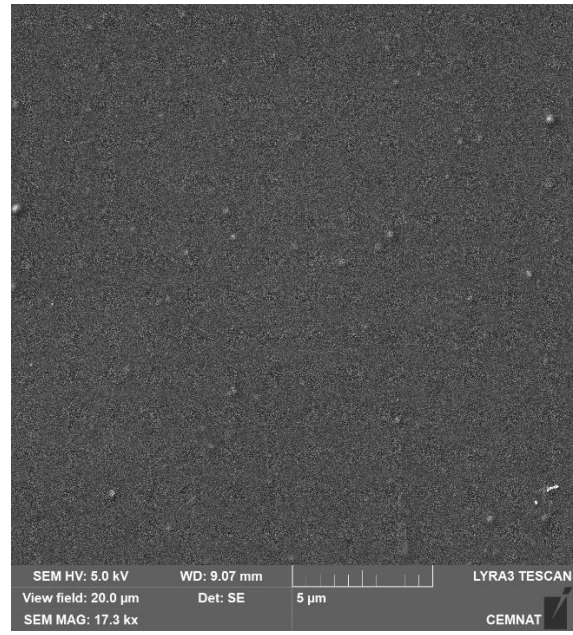

**B**

**Fig. S8 SEM** - the groove in a thin layer of  $\text{TiO}_2$  film (A) and pure  $\text{TiO}_2$  thin film on borosilicate glass
